# Supplementary material for: Off-harmonic optical probing of high intensity laser plasma expansion dynamics in solid density hydrogen jets
Source: PubMed Central journal article supplement (PMC9068928; doi:10.1038/s41598-022-10797-6), 2022-05-04
Supplement: 41598_2022_10797_MOESM1_ESM.pdf [file 41598_2022_10797_MOESM1_ESM.pdf]

# Supplementary information: Off-harmonic optical probing of high intensity laser plasma expansion dynamics in solid density hydrogen jets

**Constantin Bernert<sup>1,2,\*</sup>, Stefan Assenbaum<sup>1,2</sup>, Florian-Emanuel Brack<sup>1,2</sup>, Thomas E. Cowan<sup>1,2</sup>, Chandra B. Curry<sup>3,4</sup>, Marco Garten<sup>1,2</sup>, Lennart Gaus<sup>1,2</sup>, Maxence Gauthier<sup>3</sup>, Sebastian Göde<sup>5</sup>, Ilja Goethel<sup>1,2</sup>, Siegfried H. Glenzer<sup>3</sup>, Thomas Kluge<sup>1</sup>, Stephan Kraft<sup>1</sup>, Florian Kroll<sup>1</sup>, Michael Kuntzsch<sup>1</sup>, Josefine Metzkes-Ng<sup>1</sup>, Markus Loeser<sup>1</sup>, Lieselotte Obst-Huebl<sup>1,6</sup>, Martin Rehwald<sup>1,2</sup>, Hans-Peter Schlenvoigt<sup>1</sup>, Christopher Schoenwaelder<sup>3,7</sup>, Ulrich Schramm<sup>1,2</sup>, Mathias Siebold<sup>1</sup>, Franziska Treffert<sup>3,8</sup>, Tim Ziegler<sup>1,2</sup>, and Karl Zeil<sup>1</sup>**

<sup>1</sup>Helmholtz-Zentrum Dresden - Rossendorf, 01328 Dresden, Germany

<sup>2</sup>Technische Universität Dresden, 01062 Dresden, Germany

<sup>3</sup>SLAC National Accelerator Laboratory, Menlo Park, California 94025, USA

<sup>4</sup>University of Alberta, Edmonton, Alberta T6G 1H9, Canada

<sup>5</sup>European XFEL GmbH, 22869 Schenefeld, Germany

<sup>6</sup>Present address: Lawrence Berkeley National Laboratory, Berkeley, California, 94720, USA

<sup>7</sup>Friedrich-Alexander Universität Erlangen-Nürnberg, 91054 Erlangen, Germany

<sup>8</sup>Technische Universität Darmstadt, 64289 Darmstadt, Germany

\*c.bernert@hzdr.de

(a)

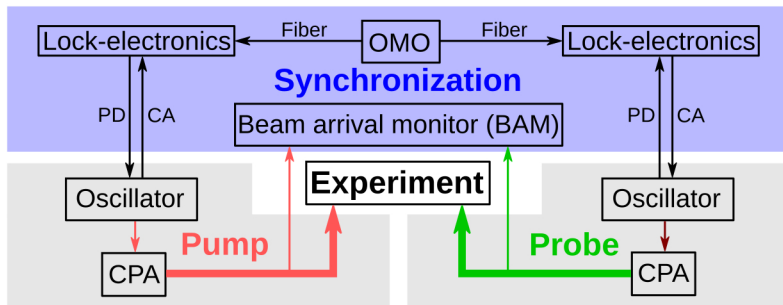

(b)

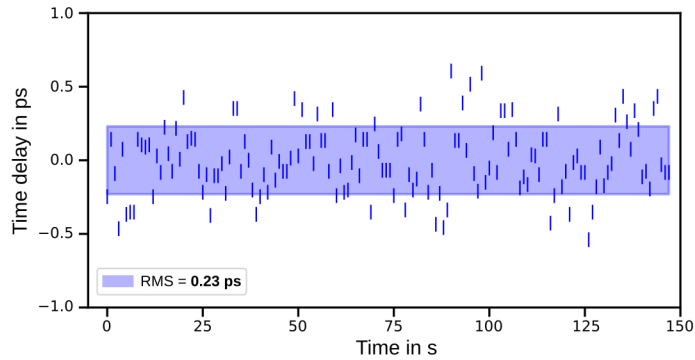

(c) Pump oscillator

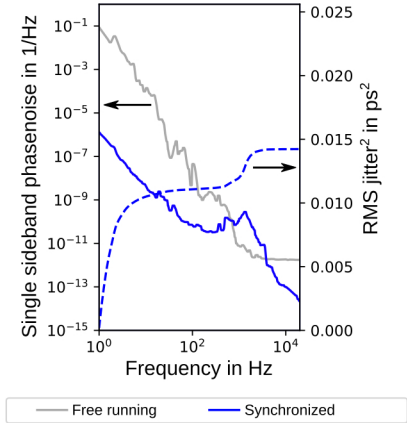

(d) Probe oscillator

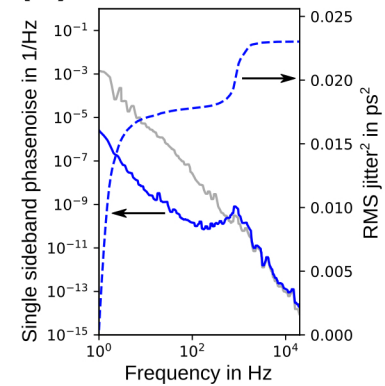

**Figure S1.** (a) Schematic of synchronization control between pump- and probe laser system, OMO - optical master oscillator, PD - photo diode, CA - cavity adjustment, CPA - chirped pulse amplification; (b) measurement of the shot-to-shot time delay via the beam arrival monitor (BAM), height of the markers gives the error of the BAM measurement; (c),(d) measurement of the single sideband phase noise versus an external clock and the calculated square of the temporal RMS-jitter for (c) pump laser oscillator and (d) probe laser oscillator.

Resolution test chart imaged via experimental setup

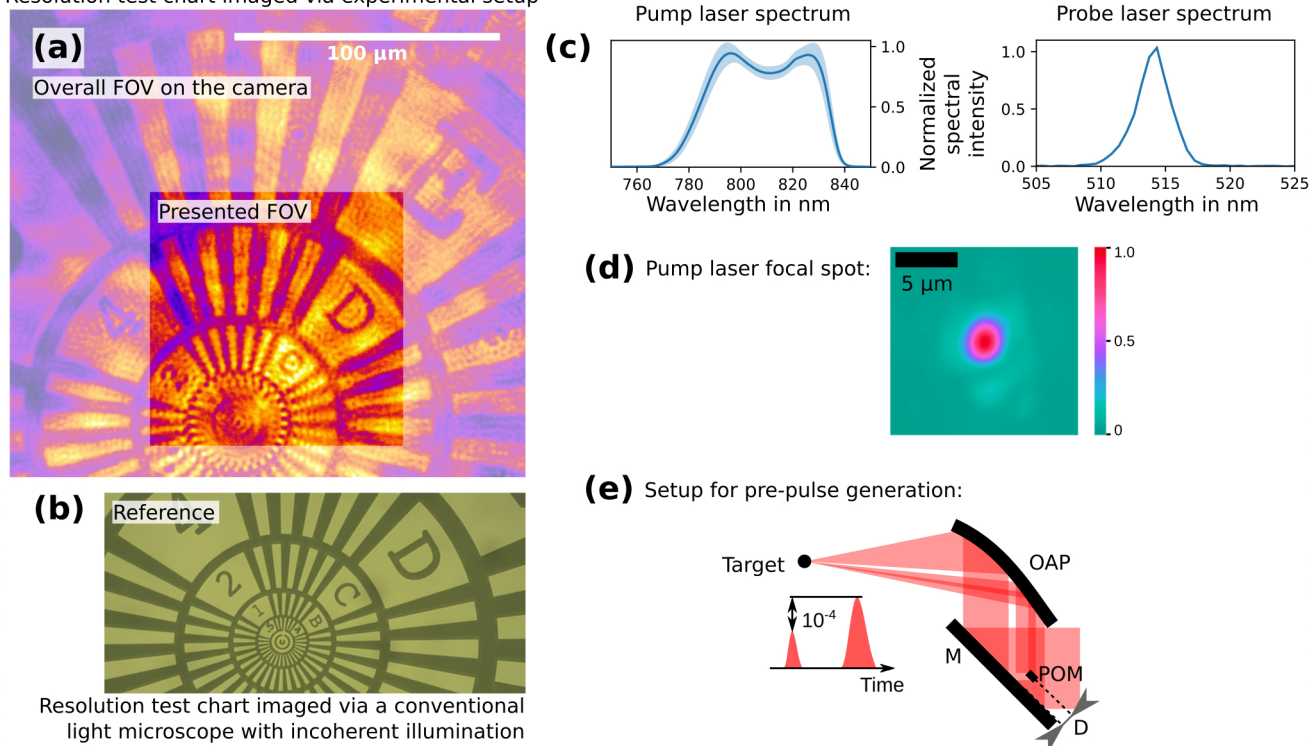

**Figure S2.** (a) Resolution test chart illuminated by the probe laser and imaged by the optical setup presented in figure 1 of the manuscript. The overall field of view (FOV) on the camera and the presented FOV (figure 3 in the manuscript) is shown. A structure size as small as 1.5 μm is resolved in all directions and no image distortion is visible within the overall FOV. (b) The same resolution test chart imaged by a conventional light microscope in bright-field operation and with incoherent illumination. The spatial scale is equivalent to figure (a). (c) **left:** Spectrum of the fully amplified pump laser beam before compression. The spectrum shows the mean and standard deviation over 37 days of laser operation. (c) **right:** Probe laser spectrum. Reproduction of the “Probe only” spectrum in figure 2 (c) of the manuscript. (d) Pump laser focal spot measured with the attenuated pump laser beam. Instead of the anti-reflection coating of the plasma mirror substrate, a reflective part of the same substrate is used to emulate the reflective plasma mirror surface during a high intensity laser shot. (e) Setup for generation of the −20 ps and −40 ps pre-pulse utilized for the measurements in figure 2 (c) of the manuscript. The pump laser beam with 18 cm beam diameter is reflected by the last folding mirror (M) to the off-axis parabola (OAP) and focused onto the target. A pick-off mirror (POM) with half-inch diameter is inserted before the last folding mirror and generates a pre-pulse with defined delay (D) at 10<sup>−4</sup> less intensity than the peak of the pump laser pulse.
